# Supplementary material for: Long-Term Pay for Performance: Cumulative Evidence over CEO Tenure
Source: Atypon-hosted journal article supplement (doi:10.1287/mnsc.2024.04322), 2025-12-09
Supplement: mnsc.2024.04322.sm1.pdf [file mnsc.2024.04322.sm1.pdf]

## **Online Appendix**

### **Long-Term Pay for Performance: Cumulative Evidence over CEO Tenure**

Kalash Jain  
*Columbia Business School*

Shivaram Rajgopal  
*Columbia Business School*

Alfred Rappaport  
*Kellogg School of Management,  
Northwestern University*

Min Jun Song  
*Columbia Business School*

September 2025

This online appendix outlines the robustness checks of our main findings. The description of the tests and discussion of the results are provided in Section 5.6 of our main draft. The appendix presents the following supporting tables:

Table OA1. Robustness Checks by Including the Incumbent CEOs

Panel A. Full Sample

Panel B. Subsample Analysis (Peer Outperformers and Underperformers)

Table OA2. Additional Robustness Checks





**Table OA2. Additional Robustness Checks**

This table conducts additional robustness checks on the expanded sample of CEOs, including incumbent CEOs. Column (1) adds an indicator variable that equals one if the CEO’s tenure overlaps with NBER recessions. Columns (2) and (3) report the pay-performance relation for a subsample of CEOs with high and low institutional ownership by dedicated investors (Bushee 1998), split on the median value. Columns (4) and (5) present a subsample analysis of CEOs who experienced forced turnover at the end of their tenure. Columns (4) and (5) include industry fixed effects due to a lack of observations within firms. Standard errors reported in the parentheses are clustered by industry (GICS 6-digit). \*\*\*, \*\*, and \* denote statistical significance at the 1%, 5%, and 10% level (two-tailed), respectively. The variables are as defined in the Appendix.

| Robustness Check:                | Add<br>Recession<br>Control                           | Subsample:<br>High<br>Dedicated<br>Investor           | Subsample:<br>Low<br>Dedicated<br>Investor            | Subsample:<br>Forced<br>Turnover                      | Subsample:<br>Voluntary<br>Turnover                   |
|----------------------------------|-------------------------------------------------------|-------------------------------------------------------|-------------------------------------------------------|-------------------------------------------------------|-------------------------------------------------------|
|                                  | (1)                                                   | (2)                                                   | (3)                                                   | (4)                                                   | (5)                                                   |
|                                  | <i>Log<br/>Realized<br/>Total Comp<br/>Exc Salary</i> |
| <i>Log(Annual SP500-Adj TSR)</i> | 1.128***<br>(0.366)                                   | 1.322*<br>(0.740)                                     | 0.715<br>(0.619)                                      | 0.357*<br>(0.206)                                     | 1.534***<br>(0.436)                                   |
| <i>Recession Indicator</i>       | 0.104<br>(0.136)                                      |                                                       |                                                       |                                                       |                                                       |
| Observations                     | 908                                                   | 309                                                   | 315                                                   | 151                                                   | 482                                                   |
| Adjusted R-squared               | 0.749                                                 | 0.734                                                 | 0.686                                                 | 0.767                                                 | 0.626                                                 |
| Controls                         | Yes                                                   | Yes                                                   | Yes                                                   | Yes                                                   | Yes                                                   |
| Fixed Effects                    | Firm                                                  | Firm                                                  | Firm                                                  | Industry                                              | Industry                                              |
| Clustered SE                     | Industry                                              | Industry                                              | Industry                                              | Industry                                              | Industry                                              |
